# Supplementary material for: Multicenter Clinical Evaluation of ETEST Plazomicin (PLZ) for Susceptibility Testing of Enterobacterales
Source: PubMed Central journal article supplement (PMC8769719; doi:10.1128/jcm.01831-21), 2022-01-19
Supplement: jcm.01831-21-s0001.pdf [file jcm.01831-21-s0001.pdf]

1 Table S1. PLZ Challenge Set Characterized Strains Listing

| Strain | Organism                     | Genotype beta-lactams ( <i>genes</i> identified by WGS)                                                                                                                                                                                  | Genotype aminoglycosides (PROTEINS and <i>genes</i> identified by WGS)                 | Beta-lactam and aminoglycoside [GEN, TOB, NET, AMI only]                     | BMD PLZ MIC (µg/mL) |
|--------|------------------------------|------------------------------------------------------------------------------------------------------------------------------------------------------------------------------------------------------------------------------------------|----------------------------------------------------------------------------------------|------------------------------------------------------------------------------|---------------------|
| 1      | <i>Citrobacter koseri</i>    | <i>bla</i> <sub>TEM-110</sub><br><i>bla</i> <sub>MAL-CKO Like</sub>                                                                                                                                                                      | AAC(3)-IIa<br>APH(3'')-Ib<br>APH(6)-Id<br>ANT(3'')-Ia                                  | Acquired Pase<br>Aminoglycoside resistant (AME*)                             | 2                   |
| 2      | <i>Citrobacter koseri</i>    | <i>bla</i> <sub>TEM-3</sub><br><i>bla</i> <sub>MAL-CKO Like</sub>                                                                                                                                                                        | AAC(6')-Ib like<br>ANT(3'')-Ia                                                         | ESBL<br>Aminoglycoside resistant (AME)                                       | 0.25                |
| 3      | <i>Klebsiella aerogenes</i>  | <i>bla</i> <sub>TEM-1</sub>                                                                                                                                                                                                              | AAC(3)-IIa<br>AAC(6')-Ib like<br>ANT(3'')-Ia<br>APH(3'')-Ib<br>APH(6)-Id               | Carbapenem Resistant (impermeability)<br>Aminoglycoside Resistant (AME)      | 0.5                 |
| 4      | <i>Enterobacter cloacae</i>  | <i>bla</i> <sub>MIR</sub>                                                                                                                                                                                                                | None                                                                                   | Carbapenem Resistant (impermeability)<br>Aminoglycoside wild                 | 0.25                |
| 5      | <i>Escherichia coli</i>      | <i>bla</i> <sub>TEM-2</sub>                                                                                                                                                                                                              | APH(3')-Ib                                                                             | Acquired Pase<br>Aminoglycoside wild                                         | 0.25                |
| 6      | <i>Klebsiella pneumoniae</i> | <i>bla</i> <sub>TEM-11</sub><br><i>bla</i> <sub>SHV-83</sub>                                                                                                                                                                             | AAC(3)-IIa<br>ANT(3'')-Ia                                                              | ESBL and/or SHV hyperproduction<br>Aminoglycoside Resistant (AME)            | 0.25                |
| 7      | <i>Escherichia coli</i>      | <i>bla</i> <sub>TEM-21</sub>                                                                                                                                                                                                             | AAC(3)-IIa<br>AAC(6')-Ib like                                                          | ESBL<br>Aminoglycoside Resistant (AME)                                       | 1                   |
| 8      | <i>Escherichia coli</i>      | <i>bla</i> <sub>TEM-29</sub><br><i>bla</i> <sub>CTX-M</sub>                                                                                                                                                                              | AAC(3)-IIa<br>ANT(3'')-Ia<br>APH(3'')-Ib<br>APH(6)-Id                                  | ESBL<br>Aminoglycoside Resistant (AME)                                       | 0.5                 |
| 9      | <i>Klebsiella aerogenes</i>  | <i>bla</i> <sub>TEM-24</sub><br><i>bla</i> <sub>AMPC</sub>                                                                                                                                                                               | AAC(6')-Ib like<br>ANT(3'')-Ia                                                         | ESBL<br>Aminoglycoside Resistant (AME)                                       | 1                   |
| 10     | <i>Citrobacter freundii</i>  | <i>bla</i> <sub>CMY-2 like</sub><br><i>bla</i> <sub>TEM-3</sub><br><i>bla</i> <sub>OXA-10 like</sub>                                                                                                                                     | AAC(3)-IIa<br>AAC(6')-Ib like<br>AAC(6')-If<br>ANT(3'')-Ia                             | ESBL<br>Aminoglycoside Resistant (AME)                                       | 0.5                 |
| 11     | <i>Klebsiella pneumoniae</i> | <i>bla</i> <sub>TEM-1</sub><br><i>bla</i> <sub>SHV (multiple alleles including one for an ESBL)</sub><br><i>bla</i> <sub>KPC</sub><br><i>bla</i> <sub>OXA-9 Like</sub><br><i>bla</i> <sub>FOX</sub><br><i>bla</i> <sub>CARB-1 like</sub> | AAC(3)-IVa<br>AAC(6')-Ib like<br>ANT(2'')-Ia<br>ANT(3'')-Ia<br>APH(3')-Ia<br>APH(4)-Ia | ESBL + Acquired Case + Carbapenemase (KPC)<br>Aminoglycoside Resistant (AME) | 0.25                |
| 12     | <i>Citrobacter freundii</i>  | <i>bla</i> <sub>CMY-2 like</sub>                                                                                                                                                                                                         | None                                                                                   | High level Case<br>Aminoglycoside wild                                       | 1                   |

| Strain | Organism                     | Genotype beta-lactams ( <i>genes</i> identified by WGS)                                                                                                                | Genotype aminoglycosides (PROTEINS and <i>genes</i> identified by WGS)                                        | Beta-lactam and aminoglycoside [GEN, TOB, NET, AMI only]                     | BMD PLZ MIC (µg/mL) |
|--------|------------------------------|------------------------------------------------------------------------------------------------------------------------------------------------------------------------|---------------------------------------------------------------------------------------------------------------|------------------------------------------------------------------------------|---------------------|
| 13     | <i>Escherichia coli</i>      | <i>bla</i> <sub>TEM-1</sub><br><i>bla</i> <sub>KPC</sub><br><i>bla</i> <sub>OXA-1</sub> like                                                                           | AAC(6')-IIc<br>ANT(3'')-Ia<br>APH(3'')-Ib<br>APH(6)-Id                                                        | Carbapenemase (KPC)<br>Aminoglycoside Resistant (AME)                        | 2                   |
| 14     | <i>Enterobacter cloacae</i>  | <i>bla</i> <sub>VIM</sub>                                                                                                                                              | AAC(6')-II<br>ANT(3'')-Ia<br>APH(3')-Ia<br>APH(3'')-Ib<br>APH(6)-Id                                           | Carbapenemase (MBL)<br>Aminoglycoside Resistant (AME)                        | 0.5                 |
| 15     | <i>Enterobacter cloacae</i>  | <i>bla</i> <sub>IMP</sub><br><i>bla</i> <sub>ACT</sub>                                                                                                                 | AAC(6')-Ib like                                                                                               | Carbapenemase (MBL)<br>Aminoglycoside Resistant (AME)                        | 0.25                |
| 16     | <i>Serratia marcescens</i>   | <i>bla</i> <sub>VIM</sub><br><i>bla</i> <sub>SEC</sub>                                                                                                                 | AAC(6')-Ic<br>AAC(6')-II<br>ANT(3'')-Ia                                                                       | Carbapenemase (MBL)<br>Aminoglycoside Resistant (AME)                        | 1                   |
| 17     | <i>Serratia marcescens</i>   | <i>bla</i> <sub>IMP</sub><br><i>bla</i> <sub>OXA-1</sub> like<br><i>bla</i> <sub>SEC</sub>                                                                             | AAC(6')-Ic                                                                                                    | Carbapenemase (MBL)<br>Aminoglycoside Resistant (AME)                        | 1                   |
| 18     | <i>Klebsiella pneumoniae</i> | <i>bla</i> <sub>TEM-1</sub><br><i>bla</i> <sub>SHV</sub> (multiple alleles including one for an ESBL)<br><i>bla</i> <sub>VIM</sub><br><i>bla</i> <sub>MOX</sub>        | AAC(6')-II<br>AAC(6')-I <sub>p</sub><br>ANT(3'')-Ia<br>APH(2'')-IIa<br>APH(3')-Ia<br>APH(3'')-Ib<br>APH(6)-Id | ESBL + Acquired Case + Carbapenemase (MBL)<br>Aminoglycoside Resistant (AME) | 0.5                 |
| 19     | <i>Klebsiella pneumoniae</i> | <i>bla</i> <sub>TEM-1</sub><br><i>bla</i> <sub>shv</sub> (multiple alleles including one for an ESBL)<br><i>bla</i> <sub>KPC</sub><br><i>bla</i> <sub>OXA-9</sub> like | AAC(6')-Ib like<br>ANT(3'')-Ia                                                                                | ESBL + Carbapenemase (KPC)<br>Aminoglycoside Resistant (AME)                 | 0.25                |
| 20     | <i>Citrobacter freundii</i>  | <i>bla</i> <sub>CMY-2</sub> like<br><i>bla</i> <sub>NDM</sub><br><i>bla</i> <sub>OXA-10</sub> like truncated<br><i>bla</i> <sub>CTX-M</sub>                            | AAC(3)-IIa<br>AAC(6')-Ib like truncated<br>ANT(2'')-Ia<br>ANT(3'')-Ia                                         | ESBL + Carbapenemase (MBL)<br>Aminoglycoside Resistant (AME)                 | 0.5                 |
| 21     | <i>Citrobacter freundii</i>  | <i>bla</i> <sub>TEM-2</sub><br><i>bla</i> <sub>CMY-2</sub> like                                                                                                        | AAC(3)-IIa<br>ANT(3'')-Ia                                                                                     | Acquired Pase<br>Aminoglycoside Resistant (AME)                              | 0.25                |
| 22     | <i>Klebsiella pneumoniae</i> | <i>bla</i> <sub>TEM-1</sub><br><i>bla</i> <sub>SHV-1</sub><br><i>bla</i> <sub>OXA-48</sub>                                                                             | None                                                                                                          | Carbapenemase (OXA-48)<br>Aminoglycoside wild                                | 0.25                |
| 23     | <i>Klebsiella pneumoniae</i> | <i>bla</i> <sub>CTX-M</sub><br><i>bla</i> <sub>SHV-11</sub><br><i>bla</i> <sub>NDM</sub><br><i>bla</i> <sub>OXA-1</sub> like                                           | AAC(3)-IIa<br>AAC(6')-Ib like truncated<br>AAC(6')-Ib-cr truncated<br>ANT(3'')-Ia                             | ESBL + Carbapenemase (MBL)<br>Aminoglycoside Resistant (AME)                 | 0.25                |

| Strain | Organism                     | Genotype beta-lactams ( <i>genes</i> identified by WGS)                                                                                                                                                                                               | Genotype aminoglycosides (PROTEINS and <i>genes</i> identified by WGS)                                                                          | Beta-lactam and aminoglycoside [GEN, TOB, NET, AMI only]                                                   | BMD PLZ MIC (µg/mL) |
|--------|------------------------------|-------------------------------------------------------------------------------------------------------------------------------------------------------------------------------------------------------------------------------------------------------|-------------------------------------------------------------------------------------------------------------------------------------------------|------------------------------------------------------------------------------------------------------------|---------------------|
| 24     | <i>Klebsiella pneumoniae</i> | <i>bla</i> <sub>CTX-M</sub><br><i>bla</i> <sub>TEM</sub> truncated<br><i>bla</i> <sub>SHV</sub> truncated<br><i>bla</i> <sub>NDM</sub><br><i>bla</i> <sub>OXA-1</sub> like<br><i>bla</i> <sub>OXA-9</sub> like<br><i>bla</i> <sub>DHA</sub> truncated | AAC(3)-IIa<br>AAC(6')-Ib like truncated<br>APH(3'')-Ib<br>APH(6)-Id<br><br><i>armA</i>                                                          | ESBL + Carbapenemase (MBL)<br>Aminoglycoside Resistant (AME and RNA methylase <i>armA</i> )                | >256                |
| 25     | <i>Providencia stuartii</i>  | <i>bla</i> <sub>TEM-1</sub><br><i>bla</i> <sub>NDM</sub><br><i>bla</i> <sub>VEB</sub><br><i>bla</i> <sub>CMY-2</sub> like                                                                                                                             | AAC(2')-Ia<br>APH(3')-Ia<br>APH(3'')-VI<br>APH(3'')-Ib<br>APH(6)-Id ?<br>ANT(3'')-Ia<br><br><i>rmtC</i>                                         | ESBL + Acquired Case +Carbapenemase (MBL)<br>Aminoglycoside Resistant (AME and RNA methylase <i>rmtC</i> ) | 256                 |
| 26     | <i>Klebsiella pneumoniae</i> | <i>bla</i> <sub>CTX-M</sub><br><i>bla</i> <sub>TEM-1</sub><br><i>bla</i> <sub>SHV-11</sub><br><i>bla</i> <sub>OXA-181</sub><br><i>bla</i> <sub>OXA-1</sub> like                                                                                       | AAC(3)-IIa<br>AAC(6')-Ib like truncated<br>AAC(6')-Ib-cr truncated<br>ANT(3'')-Ia<br>APH(3'')-Ia<br>APH(3'')-Ib<br>APH(6)-Id<br><br><i>rmtF</i> | ESBL + Carbapenemase (OXA-181)<br>Aminoglycoside resistant (AME and RNA methylase <i>rmtF</i> )            | >256                |
| 27     | <i>Escherichia coli</i>      | <i>bla</i> <sub>TEM-1</sub><br><i>bla</i> <sub>CTX-M</sub>                                                                                                                                                                                            | APH(3'')-Ib<br>APH(6)-Id<br>ANT(3'')-Ia<br><br><i>rmtB</i>                                                                                      | ESBL<br>Aminoglycoside resistant (RNA methylase <i>rmtB</i> )                                              | >256                |
| 28     | <i>Escherichia coli</i>      | <i>bla</i> <sub>TEM-1</sub><br><i>bla</i> <sub>NDM</sub><br><i>bla</i> <sub>VEB</sub><br><i>bla</i> <sub>OXA-9</sub> like                                                                                                                             | AAC(6')-Ib like truncated<br>APH(3'')-Ib<br>APH(6)-Id<br>ANT(2'')-Ia<br>ANT(3'')-Ia<br><br><i>armA</i>                                          | ESBL + Carbapenemase (MBL)<br>Aminoglycoside resistant (AME and RNA methylase <i>armA</i> )                | >256                |
| 29     | <i>Klebsiella pneumoniae</i> | <i>bla</i> <sub>CTX-M</sub><br><i>bla</i> <sub>TEM-1</sub><br><i>bla</i> <sub>SHV-1</sub><br><i>bla</i> <sub>OXA-48</sub><br><i>bla</i> <sub>OXA-1</sub> like                                                                                         | AAC(3)-IIa<br>AAC(6')-Ib-cr<br>APH(3')-Ia<br>APH(3'')-Ib<br>APH(6)-Id                                                                           | ESBL + Carbapenemase (OXA-48)<br>Aminoglycoside Resistant (AME)                                            | 0.25                |
| 30     | <i>Escherichia coli</i>      | <i>bla</i> <sub>CTX-M</sub><br><i>bla</i> <sub>TEM-1</sub><br><i>bla</i> <sub>OXA-48</sub>                                                                                                                                                            | AAC(3)-IIa<br>ANT(3'')-Ia<br>APH(3'')-Ib<br>APH(6)-Id                                                                                           | ESBL + Carbapenemase (OXA-48)<br>Aminoglycoside Resistant (AME)                                            | 0.5                 |
| 31     | <i>Citrobacter koseri</i>    | <i>bla</i> <sub>MAL-CKO</sub> Like                                                                                                                                                                                                                    | None                                                                                                                                            | Pase<br>Aminoglycoside wild                                                                                | 0.25                |
| 32     | <i>Klebsiella oxytoca</i>    | <i>bla</i> <sub>OXY</sub>                                                                                                                                                                                                                             | APH(3')-Ia truncated                                                                                                                            | Beta lactam and<br>Aminoglycoside wild                                                                     | 0.5                 |

| Strain | Organism                     | Genotype beta-lactams ( <i>genes</i> identified by WGS)                                                                                                                                                | Genotype aminoglycosides (PROTEINS and <i>genes</i> identified by WGS)                               | Beta-lactam and aminoglycoside [GEN, TOB, NET, AMI only]                                    | BMD PLZ MIC (µg/mL) |
|--------|------------------------------|--------------------------------------------------------------------------------------------------------------------------------------------------------------------------------------------------------|------------------------------------------------------------------------------------------------------|---------------------------------------------------------------------------------------------|---------------------|
| 33     | <i>Klebsiella oxytoca</i>    | <i>bla</i> <sub>TEM-1</sub><br><i>bla</i> <sub>OXA-2 Like</sub> truncated<br><i>bla</i> <sub>OXY</sub>                                                                                                 | AAC(6')-IIc<br>ANT(2'')-Ia truncated<br>APH(3'')-Ia<br>APH(3'')-Ib<br>APH(6)-Id                      | Carbapenem Resistant (impermeability)<br>Aminoglycoside Resistant (AME)                     | 1                   |
| 34     | <i>Klebsiella pneumoniae</i> | <i>bla</i> <sub>TEM-1</sub><br><i>bla</i> <sub>SHV-12</sub><br><i>bla</i> <sub>OXA-48</sub><br><i>bla</i> <sub>OXA-1 like</sub>                                                                        | AAC(3)-IIa<br>AAC(6')-Ib-cr<br>ANT(3'')-Ia                                                           | ESBL + Carbapenemase (OXA-48)<br>Aminoglycoside Resistant (AME)                             | 0.5                 |
| 35     | <i>Klebsiella oxytoca</i>    | <i>bla</i> <sub>TEM-1</sub><br><i>bla</i> <sub>KPC</sub><br><i>bla</i> <sub>OXA-9 like</sub><br><i>bla</i> <sub>OXY</sub>                                                                              | AAC(6')-Ib like<br>ANT(3'')-Ia<br>APH(3'')-Ia truncated<br>APH(3'')-Ib<br>APH(6)-Id truncated        | Carbapenemase (KPC)<br>Aminoglycoside Resistant (AME)                                       | 0.5                 |
| 36     | <i>Klebsiella oxytoca</i>    | <i>bla</i> <sub>TEM-1</sub><br><i>bla</i> <sub>KPC</sub><br><i>bla</i> <sub>OXA-9 like</sub><br><i>bla</i> <sub>OXY</sub>                                                                              | AAC(6')-Ib like<br>ANT(3'')-Ia<br>APH(3'')-Ia truncated<br>APH(3'')-Ib<br>APH(6)-Id truncated        | Carbapenemase (KPC)<br>Aminoglycoside Resistant (AME)                                       | 0.25                |
| 37     | <i>Klebsiella oxytoca</i>    | <i>bla</i> <sub>TEM-1</sub><br><i>bla</i> <sub>KPC</sub><br><i>bla</i> <sub>OXA-9 like</sub><br><i>bla</i> <sub>OXY</sub>                                                                              | AAC(6')-Ib like<br>ANT(3'')-Ia<br>APH(3'')-Ia truncated<br>APH(3'')-Ib<br>APH(6)-Id truncated        | Carbapenemase (KPC)<br>Aminoglycoside Resistant (AME)                                       | 0.25                |
| 38     | <i>Klebsiella oxytoca</i>    | <i>bla</i> <sub>OXY</sub>                                                                                                                                                                              | None                                                                                                 | High level natural Pase (K1)<br>Aminoglycoside wild                                         | 0.25                |
| 39     | <i>Enterobacter cloacae</i>  | <i>bla</i> <sub>TEM-1</sub><br><i>bla</i> <sub>CTX-M</sub><br><i>bla</i> <sub>OXA-48</sub><br><i>bla</i> <sub>OXA-1 like</sub><br><i>bla</i> <sub>ACT</sub>                                            | AAC(3)-IIa<br>AAC(6')-Ib-cr<br>ANT(3'')-Ia<br>APH(3'')-Ib truncated<br>APH(6)-Id                     | ESBL + Carbapenemase (OXA-48)<br>Aminoglycoside Resistant (AME)                             | 0.25                |
| 40     | <i>Enterobacter cloacae</i>  | <i>bla</i> <sub>SHV-12</sub><br><i>bla</i> <sub>VIM</sub><br><i>bla</i> <sub>ACT</sub>                                                                                                                 | AAC(6')-Ib like<br>ANT(3'')-Ia                                                                       | ESBL + Carbapenemase (MBL)<br>Aminoglycoside Resistant (AME)                                | 0.25                |
| 41     | <i>Escherichia coli</i>      | <i>bla</i> <sub>TEM-1</sub><br><i>bla</i> <sub>CTX-M</sub><br><i>bla</i> <sub>NDM</sub><br><i>bla</i> <sub>OXA-1 like</sub><br><i>bla</i> <sub>OXA-9 like</sub><br><i>bla</i> <sub>DHA</sub> truncated | AAC(3)-IIa<br>AAC(6')-Ib like truncated<br>AAC(6')-Ib-cr truncated<br>ANT(3'')-Ia<br><br><i>armA</i> | ESBL + Carbapenemase (MBL)<br>Aminoglycoside resistant (AME and RNA methylase <i>armA</i> ) | >256                |
| 42     | <i>Klebsiella aerogenes</i>  | <i>bla</i> <sub>TEM-24</sub>                                                                                                                                                                           | AAC(6')-Ib like truncated<br>ANT(3'')-Ia                                                             | ESBL<br>Aminoglycoside Resistant (AME)                                                      | 0.5                 |
| 43     | <i>Enterobacter cloacae</i>  | <i>bla</i> <sub>TEM-1</sub><br><i>bla</i> <sub>SHV-12</sub><br><i>bla</i> <sub>ACT</sub>                                                                                                               | AAC(6')-Ib like<br>AAC(6')-IIc<br>ANT(3'')-Ia<br>APH(3'')-Ib<br>APH(6)-Id                            | ESBL<br>Aminoglycoside Resistant (AME)                                                      | 0.5                 |

| Strain | Organism                     | Genotype beta-lactams ( <i>genes</i> identified by WGS)                                                                                                        | Genotype aminoglycosides (PROTEINS and <i>genes</i> identified by WGS) | Beta-lactam and aminoglycoside [GEN, TOB, NET, AMI only]                       | BMD PLZ MIC (µg/mL) |
|--------|------------------------------|----------------------------------------------------------------------------------------------------------------------------------------------------------------|------------------------------------------------------------------------|--------------------------------------------------------------------------------|---------------------|
| 44     | <i>Enterobacter cloacae</i>  | <i>bla</i> <sub>CTX-M</sub><br><i>bla</i> <sub>OXA-1</sub> like<br><i>bla</i> <sub>ACT</sub>                                                                   | AAC(3)-IIa<br>AAC(6')-Ib-cr<br>ANT(3'')-Ia<br>APH(3'')-Ib<br>APH(6)-Id | ESBL<br>Aminoglycoside Resistant (AME)                                         | 0.5                 |
| 45     | <i>Enterobacter cloacae</i>  | <i>bla</i> <sub>CTX-M</sub><br><i>bla</i> <sub>SHV-12</sub><br><i>bla</i> <sub>ACT</sub>                                                                       | AAC(6')-Ib like<br>ANT(2'')-Ia<br>ANT(3'')-Ia                          | ESBL<br>Aminoglycoside Resistant (AME)                                         | 0.25                |
| 46     | <i>Enterobacter cloacae</i>  | <i>bla</i> <sub>ACT</sub>                                                                                                                                      | None                                                                   | High Level Case<br>Aminoglycoside wild                                         | 0.5                 |
| 47     | <i>Enterobacter cloacae</i>  | <i>bla</i> <sub>ACT</sub>                                                                                                                                      | None                                                                   | Beta lactam and<br>Aminoglycoside wild                                         | 0.5                 |
| 48     | <i>Providencia stuartii</i>  | <i>bla</i> <sub>TEM-1</sub><br><i>bla</i> <sub>SCO</sub><br><i>bla</i> <sub>ACC</sub>                                                                          | AAC(2')-Ia<br>APH(3'')-Ia<br>APH(3'')-Ib<br>APH(6)-Id<br>ANT(3'')-Ia   | Undetermined for beta-lactams<br>Aminoglycoside wild                           | 1                   |
| 49     | <i>Citrobacter freundii</i>  | <i>bla</i> <sub>CMY-2</sub> like                                                                                                                               | None                                                                   | High Level Case<br>Aminoglycoside wild                                         | 0.5                 |
| 50     | <i>Klebsiella aerogenes</i>  | None                                                                                                                                                           | None                                                                   | High Level Case<br>Aminoglycoside wild                                         | 0.5                 |
| 51     | <i>Klebsiella pneumoniae</i> | <i>bla</i> <sub>TEM-1</sub><br><i>bla</i> <sub>SHV-11</sub><br><i>bla</i> <sub>CTX-M</sub><br><i>bla</i> <sub>OXA-1</sub> like<br><i>bla</i> <sub>OXA-48</sub> | AAC(3)-IIa<br>AAC(6')-Ib-cr                                            | ESBL + Carbapenemase (OXA-48)<br>Aminoglycoside Resistant (AME)                | 8                   |
| 52     | <i>Klebsiella pneumoniae</i> | <i>bla</i> <sub>TEM-1</sub><br><i>bla</i> <sub>SHV-11</sub><br><i>bla</i> <sub>CTX-M</sub><br><i>bla</i> <sub>OXA-1</sub> like<br><i>bla</i> <sub>OXA-48</sub> | AAC(3)-IIa<br>AAC(6')-Ib-cr                                            | ESBL + Carbapenemase (OXA-48)<br>Aminoglycoside Resistant (AME)                | 16                  |
| 53     | <i>Proteus mirabilis</i>     | <i>bla</i> <sub>TEM-1</sub><br><i>bla</i> <sub>SHV-12</sub>                                                                                                    | APH(3'')-Ia<br>APH(3'')-Ib<br>APH(6)-Id<br>ANT(3'')-Ia                 | ESBL<br>Aminoglycoside wild                                                    | 32                  |
| 54     | <i>Klebsiella aerogenes</i>  | None                                                                                                                                                           | None                                                                   | Undetermined                                                                   | 8                   |
| 55     | <i>Morganella morganii</i>   | <i>bla</i> <sub>DHA</sub>                                                                                                                                      | None                                                                   | Undetermined                                                                   | 16                  |
| 56     | <i>Klebsiella pneumoniae</i> | <i>bla</i> <sub>TEM-1</sub><br><i>bla</i> <sub>SHV-11</sub><br><i>bla</i> <sub>KPC</sub><br><i>bla</i> <sub>OXA-9</sub> like                                   | AAC(6')-Ib like<br>APH(3'')-Ib<br>APH(6)-Id<br>ANT(3'')-Ia             | Carbapenemase (KPC)<br>Aminoglycoside Resistant (AME)                          | 2                   |
| 57     | <i>Klebsiella aerogenes</i>  | <i>bla</i> <sub>SHV-12</sub>                                                                                                                                   | AAC(6')-Ib like<br>AAC(6')-IIc<br>ANT(3'')-Ia                          | ESBL + Carbapenem Resistant (impermeability)<br>Aminoglycoside Resistant (AME) | 1                   |

| Strain | Organism                      | Genotype beta-lactams ( <i>genes</i> identified by WGS)                                                                                                                          | Genotype aminoglycosides (PROTEINS and <i>genes</i> identified by WGS)                                     | Beta-lactam and aminoglycoside [GEN, TOB, NET, AMI only]                 | BMD PLZ MIC (µg/mL) |
|--------|-------------------------------|----------------------------------------------------------------------------------------------------------------------------------------------------------------------------------|------------------------------------------------------------------------------------------------------------|--------------------------------------------------------------------------|---------------------|
| 58     | <i>Citrobacter freundii</i>   | <i>bla</i> <sub>CMY-2</sub> like                                                                                                                                                 | None                                                                                                       | Beta lactam and Aminoglycoside wild                                      | 0.5                 |
| 59     | <i>Morganella morganii</i>    | <i>bla</i> <sub>DHA</sub>                                                                                                                                                        | None                                                                                                       | High Level Case Aminoglycoside wild                                      | 8                   |
| 60     | <i>Morganella morganii</i>    | <i>bla</i> <sub>DHA</sub>                                                                                                                                                        | None                                                                                                       | Beta lactam and Aminoglycoside wild                                      | 2                   |
| 61     | <i>Proteus mirabilis</i>      | <i>bla</i> <sub>TEM-1</sub><br><i>bla</i> <sub>CMY-2</sub> like<br><i>bla</i> <sub>OXA-2</sub> like                                                                              | AAC(3)-IIa<br>AAC(6')-Ib like<br>ANT(3'')-Ia                                                               | ESBL + Acquired Case Aminoglycoside Resistant (AME)                      | 8                   |
| 62     | <i>Proteus vulgaris</i> group | None                                                                                                                                                                             | None                                                                                                       | Acquired Pase Aminoglycoside wild                                        | 4                   |
| 63     | <i>Serratia marcescens</i>    | None                                                                                                                                                                             | AAC(6')-Ic                                                                                                 | Undetermined for beta-lactams Aminoglycoside Resistant (AME)             | 1                   |
| 64     | <i>Klebsiella pneumoniae</i>  | <i>bla</i> <sub>SHV</sub> ( <i>multiple alleles including one for an ESBL</i> )<br><i>bla</i> <sub>OXA-10</sub> like                                                             | APH(3'')-Ib<br>APH(6)-Id truncated<br>ANT(3'')-Ia truncated                                                | ESBL + Carbapenem Resistant (impermeability) Aminoglycoside undetermined | 8                   |
| 65     | <i>Serratia marcescens</i>    | <i>bla</i> <sub>SEC</sub>                                                                                                                                                        | None                                                                                                       | Beta lactam and Aminoglycoside wild                                      | 1                   |
| 66     | <i>Proteus vulgaris</i> group | None                                                                                                                                                                             | None                                                                                                       | Acquired Pase or wild (cefuroximase) Aminoglycoside wild                 | 4                   |
| 67     | <i>Proteus vulgaris</i> group | None                                                                                                                                                                             | None                                                                                                       | Acquired Pase Aminoglycoside wild                                        | 2                   |
| 68     | <i>Klebsiella pneumoniae</i>  | <i>bla</i> <sub>TEM-1</sub><br><i>bla</i> <sub>SHV</sub> ( <i>multiple alleles including one for an ESBL</i> )<br><i>bla</i> <sub>VEB</sub><br><i>bla</i> <sub>OXA-10</sub> like | AAC(6')-Ib like<br>APH(3')-Ia<br>APH(3'')-Ib<br>APH(6)-Id<br>ANT(2'')-Ia<br>ANT(3'')-Ia<br><br><i>rmtB</i> | ESBL Aminoglycoside Resistant (AME and RNA methylase <i>rmtB</i> )       | >256                |
| 69     | <i>Escherichia coli</i>       | <i>bla</i> <sub>TEM-1</sub>                                                                                                                                                      | APH(3'')-Ib<br>APH(6)-Id                                                                                   | Acquired Pase Aminoglycoside undetermined                                | 4                   |
| 70     | <i>Proteus vulgaris</i> group | None                                                                                                                                                                             | None                                                                                                       | Undetermined                                                             | 2                   |
| 71     | <i>Klebsiella pneumoniae</i>  | <i>bla</i> <sub>SHV-11</sub>                                                                                                                                                     | None                                                                                                       | Acquired Pase Aminoglycoside undetermined                                | 4                   |
| 72     | <i>Proteus mirabilis</i>      | <i>bla</i> <sub>TEM-1</sub>                                                                                                                                                      | APH(3')-Ia<br>APH(3'')-Ib<br>APH(6)-Id<br>ANT(3'')-Ia                                                      | Acquired Pase Aminoglycoside wild                                        | 4                   |

| Strain | Organism                      | Genotype beta-lactams ( <i>genes</i> identified by WGS)                                        | Genotype aminoglycosides (PROTEINS and <i>genes</i> identified by WGS) | Beta-lactam and aminoglycoside [GEN, TOB, NET, AMI only]                     | BMD PLZ MIC (µg/mL) |
|--------|-------------------------------|------------------------------------------------------------------------------------------------|------------------------------------------------------------------------|------------------------------------------------------------------------------|---------------------|
| 73     | <i>Klebsiella oxytoca</i>     | <i>bla</i> <sub>TEM-1</sub><br><i>bla</i> <sub>OXY</sub>                                       | ANT(3'')-Ia                                                            | High level Natural Pase (K1)<br>Aminoglycoside undetermined                  | 2                   |
| 74     | <i>Proteus vulgaris</i> group | None                                                                                           | None                                                                   | High level cefuroxime<br>Aminoglycoside wild                                 | 4                   |
| 75     | <i>Escherichia coli</i>       | <i>bla</i> <sub>TEM-1</sub>                                                                    | None                                                                   | Acquired Pase<br>Aminoglycoside undetermined                                 | 4                   |
| 76     | <i>Proteus mirabilis</i>      | <i>bla</i> <sub>TEM-1</sub><br><i>bla</i> <sub>CARB-1 like</sub>                               | AAC(3)-Id<br>APH(3')-Ia<br>APH(3'')-Ib<br>APH(6)-Id<br>ANT(3'')-Ia     | Inhibitor resistant Pase<br>Aminoglycoside Resistant (AME)                   | 2                   |
| 77     | <i>Klebsiella pneumoniae</i>  | <i>bla</i> <sub>SHV-1</sub><br><i>bla</i> <sub>KPC</sub>                                       | <i>armA</i>                                                            | Carbapenemase (KPC)<br>Aminoglycoside Resistant (RNA methylase <i>armA</i> ) | >256                |
| 78     | <i>Escherichia coli</i>       | <i>bla</i> <sub>TEM-1</sub><br><i>bla</i> <sub>CTX-M</sub><br><i>bla</i> <sub>OXA-1 like</sub> | AAC(3)-IIa<br>AAC(6')-Ib-cr<br>ANT(3'')-Ia<br><i>rmtB</i>              | ESBL<br>Aminoglycoside Resistant (AME and RNA methylase <i>rmtB</i> )        | >256                |
| 79     | <i>Escherichia coli</i>       | <i>bla</i> <sub>TEM-1</sub><br><i>bla</i> <sub>CTX-M</sub>                                     | AAC(3)-IIa<br>APH(3')-IIa<br>ANT(3'')-Ia<br><i>rmtB</i>                | ESBL<br>Aminoglycoside Resistant (AME and RNA methylase <i>rmtB</i> )        | >256                |
| 80     | <i>Escherichia coli</i>       | <i>bla</i> <sub>TEM-1</sub><br><i>bla</i> <sub>CTX-M</sub>                                     | AAC(3)-IIa                                                             | ESBL<br>Aminoglycoside Resistant (AME)                                       | 1                   |

2 \*AME = Aminoglycoside Modifying Enzymes

3 Pase = penicillinase

4 Case = cephalosporinase
